# Supplementary material for: Human mitochondria require mtRF1 for translation termination at non-canonical stop codons
Source: PubMed Central journal article supplement (PMC9810596; doi:10.1038/s41467-022-35684-6), 2023-01-03
Supplement: 41467_2022_35684_MOESM1_ESM.pdf [file 41467_2022_35684_MOESM1_ESM.pdf]

SUPPLEMENTARY INFORMATION

**Human mitochondria require mtRF1 for translation termination at  
non-canonical stop codons**

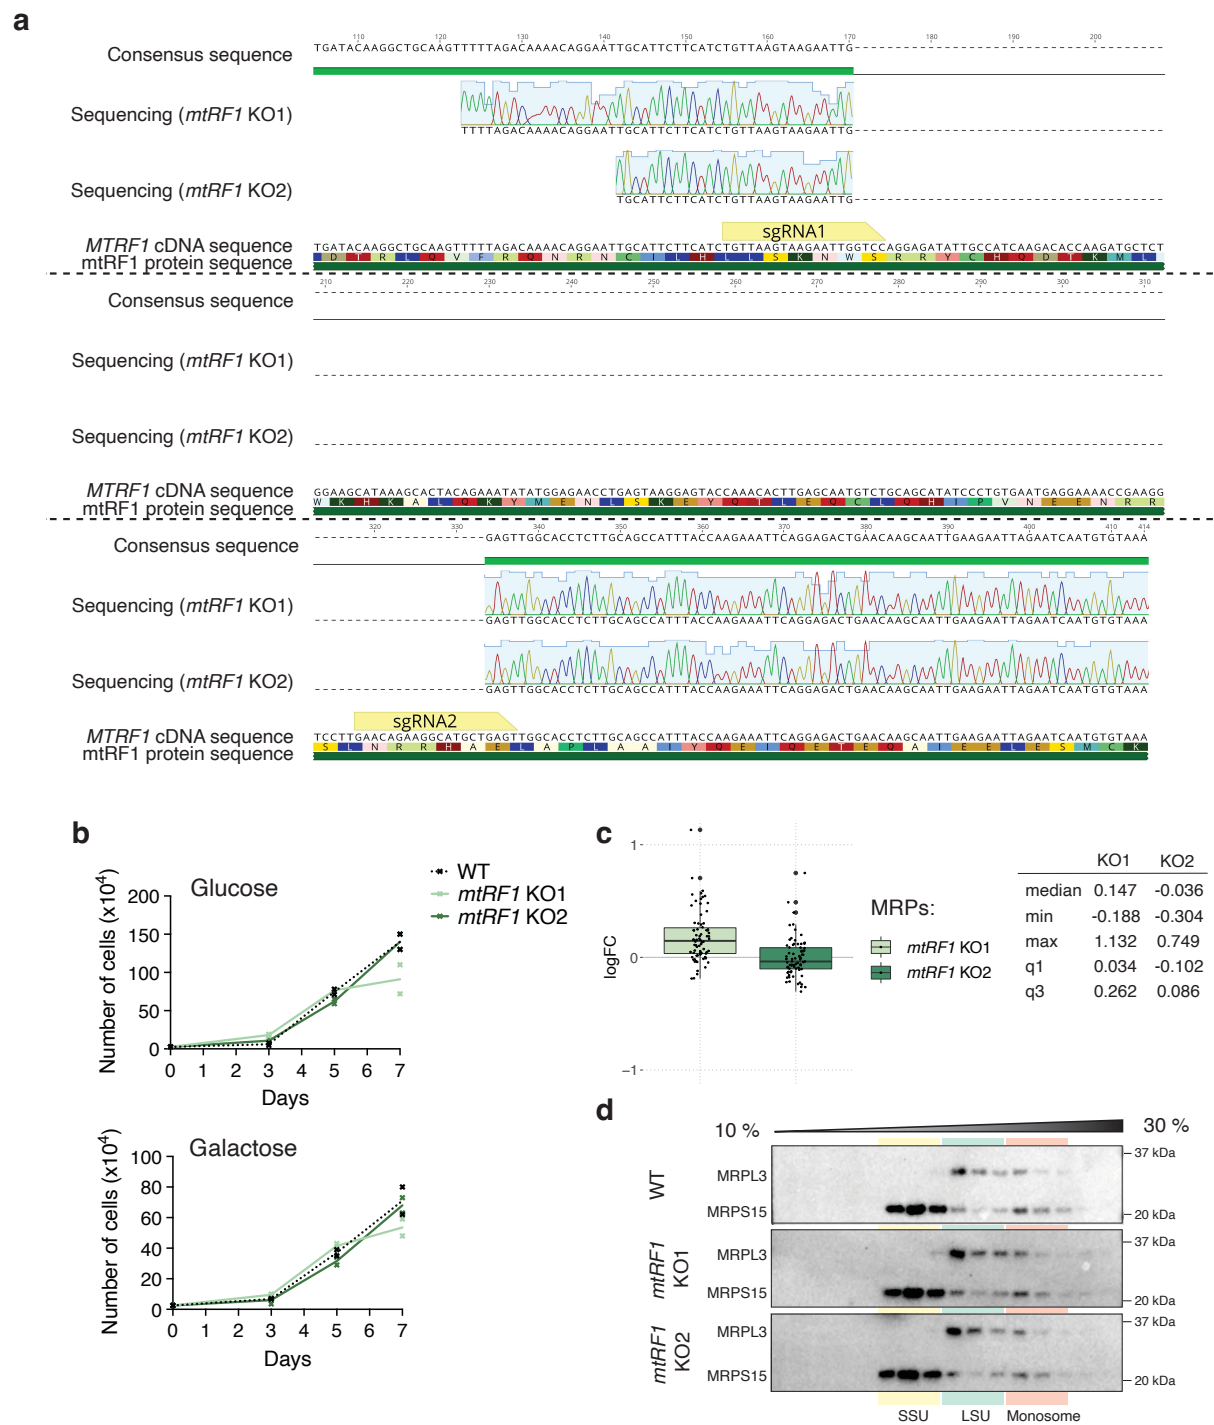

**Supplementary Fig. 1: Analysis of *mtRF1* KO cells. a** Out-of-frame deletion within *MTRF1* generated by CRISPR/Cas9 system analyzed by Sanger sequencing. Alignments of sequencing data and *MTRF1* cDNA sequence are depicted. **b** Growth curve of HEK WT and *mtRF1* KO cells in glucose and galactose based medium.  $5 \times 10^4$  cells were seeded on day 0. Two biological replicates are plotted for each sample. **c** Quantitative mass spectrometry analysis of mitochondrial proteins (MRPs) from WT and *mtRF1* KO mitolysates. Log<sub>2</sub>(fold change) (logFC) of *mtRF1* KO1 and *mtRF1* KO2 compared to WT samples are plotted (values are listed in Supplementary Table 3). Each dot represents one MRP. n=3 independent experiments. **d** Sedimentation of mitochondrial ribosomes from WT and *mtRF1* KO cells on 10–30 % isokinetic sucrose gradients. Equal amounts of mitolysates were loaded. 100  $\mu$ l fractions were collected

and analyzed by western blotting using antibodies against mitochondrial LSU (MRPL3) and SSU (MRPS15). Expected fractions containing SSU, LSU and monosome are highlighted. A representative blot of n=2 technical replicates is depicted.

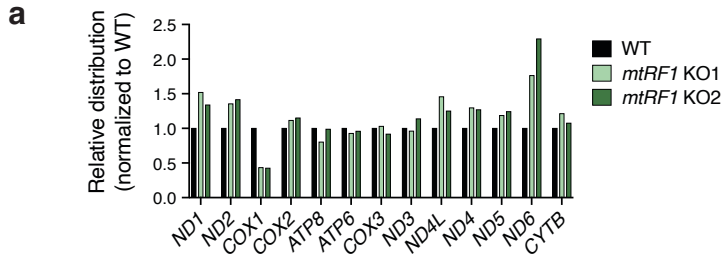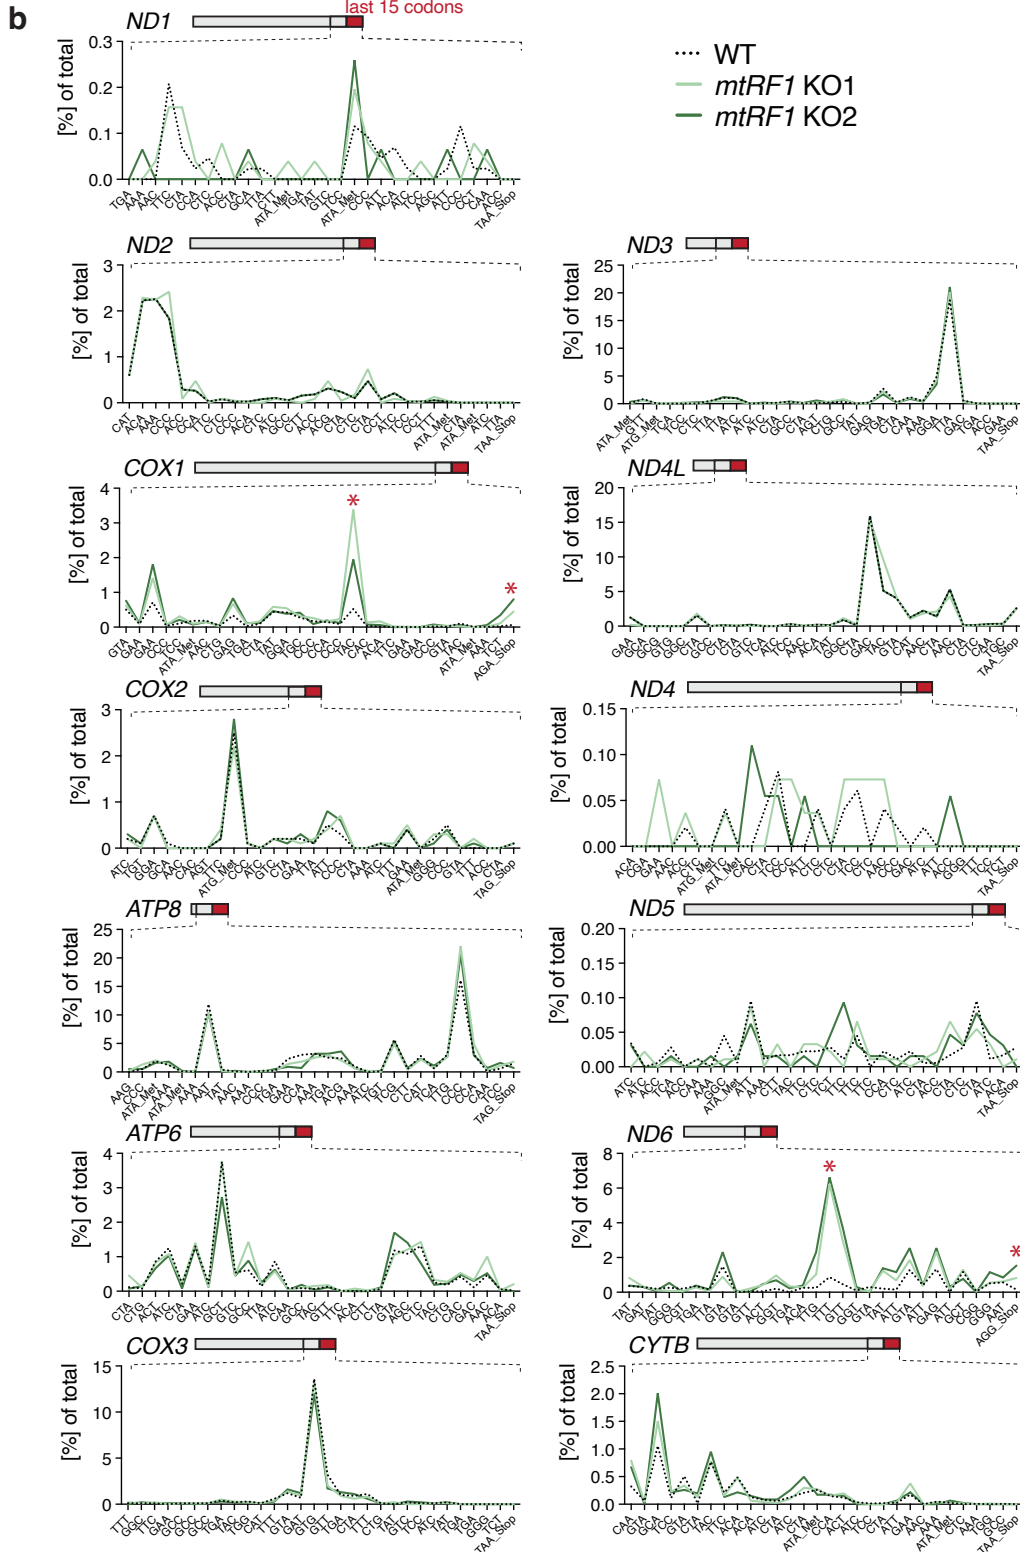

**Supplementary Fig. 2:** Analysis of ribosome profiling data of WT and *mtRF1* KO cells. **a** Percentual occupancies of mitoribosomes from *mtRF1* KO cells on mitochondrial transcripts normalized to WT (refers to Fig. 1b). This graph does not show absolute occupancy differences but relative distributions. **b** Occupancy of mitoribosomes within the last 30 codons of each ORF relative to the total occupancy on each transcript. The length of each transcript is shown schematically, where the length of the depicted area is highlighted in red. Stalling was observed for COX1 and ND6 (marked with \*).

**a**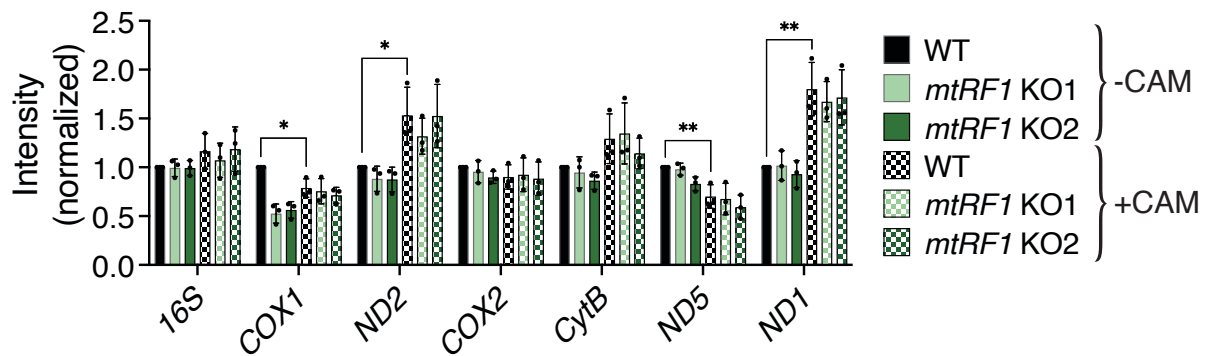**b**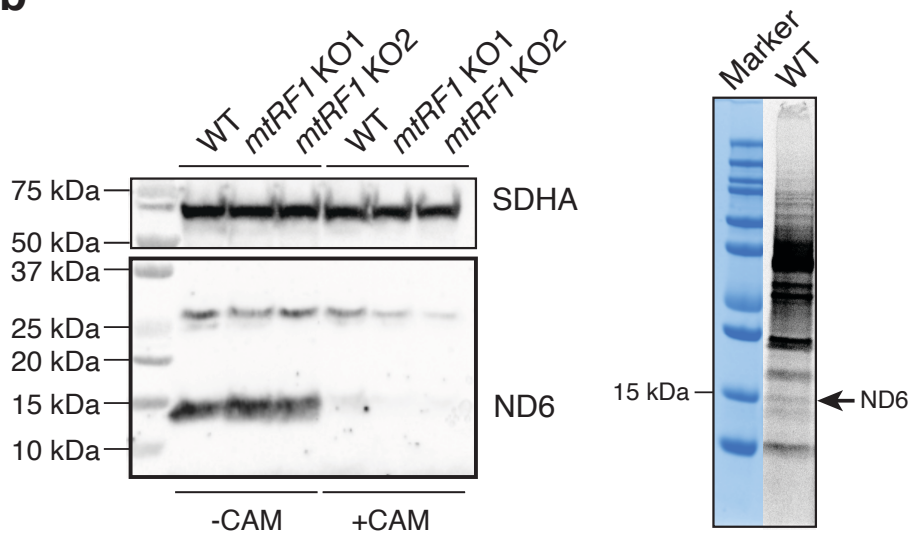

**Supplementary Fig. 3: a** Quantification of Fig. 2c samples normalized to WT (-CAM) samples. To account for different loading, all band intensities were first normalized to 18S rRNA band intensity (EtBr staining). Means and SD of n=3 independent experiments. Unpaired two-tailed t-test (\* P<0.05; \*\* P<0.01; \*\*\* P<0.001; significances for *mtRF1* WT -/+ CAM are shown). **b** Evaluation of ND6 migration in SDS-PAGE. Left: ND6 antibody was tested on mitolysates from cells non-treated/treated for 48 h with chloramphenicol. Loading was assessed by SDHA detection. Same blot as in Fig. 2g (right) is shown. Right: *De novo* synthesis of mitochondrial proteins from WT cells analyzed by [<sup>35</sup>S]-labeling. Radiograph was aligned with protein marker from the same gel. Band corresponding to ND6 was assigned according to western blot results. n=1 experiment.

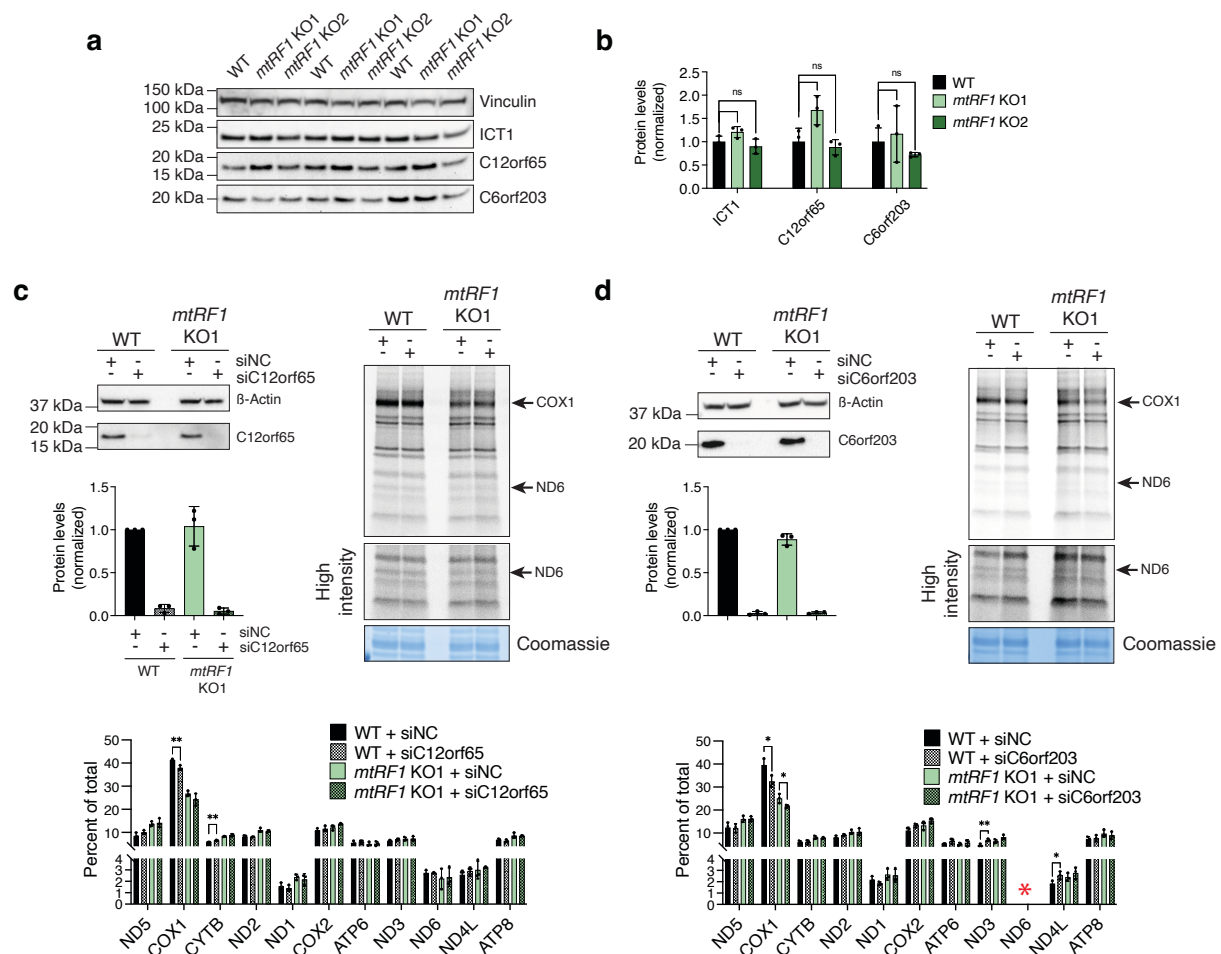

**Supplementary Fig. 4:** Analysis of components of the mitoribosome rescue machinery upon loss of mtRF1. **a** ICT1, C12orf65, and C6orf203 protein levels analyzed by western blotting. Whole cell lysates were loaded. Loading was assessed by Vinculin detection. **b** Quantification of a) normalized to protein levels in WT cells. Means and SD of n=3 replicates. Unpaired t-test (\* P<0.05; \*\* P<0.01; \*\*\* P<0.001). **c** Knockdown of C12orf65 in WT and *mtRF1* KO1 cells. Cells were either transfected with siRNA targeting *C12orf65* (siC12orf65) or non-targeting control (siNC). 72 h after transfection C12orf65 protein steady-state levels were analyzed by western blotting (Upper left: Representative blot and quantification of C12orf65 protein levels normalized to WT + siNC from three independent experiments). *De novo* synthesis of mitochondrial proteins was analyzed by [<sup>35</sup>S]-labeling (Upper right: Representative image of three independent experiments; arrows highlight bands corresponding to COX1 and ND6). Lower center: Quantification of [<sup>35</sup>S]-labeling normalized to the total signal of the respective sample. Means and SD of n=3 independent experiments. Paired two-tailed t-test (\* P<0.05; \*\* P<0.01; \*\*\* P<0.001). **d** Knockdown of *C6orf203* in WT and *mtRF1* KO1 cells. Cells were either transfected with siRNA targeting *C6orf203* (siC6orf203) or non-targeting control (siNC). 72 h after transfection C6orf203 protein steady state levels were analyzed by western blotting (Upper left: Representative blot and quantification of C6orf203 protein levels normalized to WT + siNC from three independent experiments). *De novo* synthesis of mitochondrial proteins was analyzed by [<sup>35</sup>S]-labeling (Upper right: Representative image of three independent experiments; arrows highlight bands corresponding to COX1 and ND6). Lower center: Quantification of [<sup>35</sup>S]-labeling normalized to the total signal of the respective sample. Means and SD of n=3 independent experiments. Due to low resolution, ND6 could not be quantified (highlighted by red asterisk). Paired two-tailed t-test (\* P<0.05; \*\* P<0.01; \*\*\* P<0.001).

**a**

|        | Complex I |        | Complex II |       | Complex III |        | Complex IV |        | Complex V |        |
|--------|-----------|--------|------------|-------|-------------|--------|------------|--------|-----------|--------|
|        | KO1       | KO2    | KO1        | KO2   | KO1         | KO2    | KO1        | KO2    | KO1       | KO2    |
| median | -0.007    | -0.025 | -0.306     | 0.198 | 0.118       | -0.143 | -0.712     | -0.857 | 0.126     | 0.045  |
| min    | -0.369    | -0.481 | -0.76      | 0.1   | -0.128      | -0.274 | -0.976     | -1.463 | -0.243    | -0.063 |
| max    | 0.783     | 0.5    | 0.148      | 0.296 | 0.635       | 0.549  | -0.167     | -0.134 | 1.194     | 0.901  |
| q1     | -0.178    | -0.132 | -0.533     | 0.149 | 0.028       | -0.188 | -0.918     | -1.08  | -0.141    | -0.007 |
| q3     | 0.169     | 0.101  | -0.079     | 0.247 | 0.276       | 0.043  | -0.68      | -0.561 | 0.219     | 0.072  |

**b**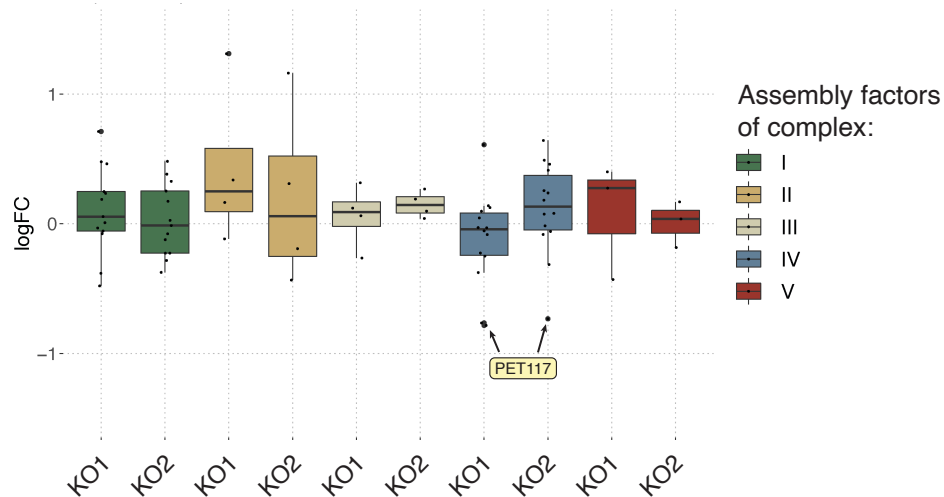

|        | Complex I |        | Complex II |        | Complex III |       | Complex IV |        | Complex V |        |
|--------|-----------|--------|------------|--------|-------------|-------|------------|--------|-----------|--------|
|        | KO1       | KO2    | KO1        | KO2    | KO1         | KO2   | KO1        | KO2    | KO1       | KO2    |
| median | 0.055     | -0.014 | 0.25       | 0.058  | 0.09        | 0.144 | -0.044     | 0.131  | 0.274     | 0.037  |
| min    | -0.479    | -0.375 | -0.117     | -0.434 | -0.264      | 0.04  | -0.784     | -0.733 | -0.43     | -0.184 |
| max    | 0.711     | 0.481  | 1.311      | 1.161  | 0.315       | 0.267 | 0.609      | 0.642  | 0.4       | 0.168  |
| q1     | -0.057    | -0.227 | 0.094      | -0.252 | -0.02       | 0.083 | -0.244     | -0.049 | -0.078    | -0.074 |
| q3     | 0.248     | 0.252  | 0.581      | 0.522  | 0.169       | 0.209 | 0.083      | 0.373  | 0.337     | 0.103  |

**Supplementary Fig. 5: a** Summary of boxplots presented in Fig. 3a. **b** Quantitative mass spectrometry analysis of OXPHOS assembly factors from mitolysates from *mtRF1* KO1 and KO2 compared to WT cells. Log<sub>2</sub>(fold change) (logFC) compared to WT samples is plotted (values are listed in Supplementary Table 5). Each dot represents one assembly factor. Same dataset as in Fig. 3a. n=3 independent experiments.



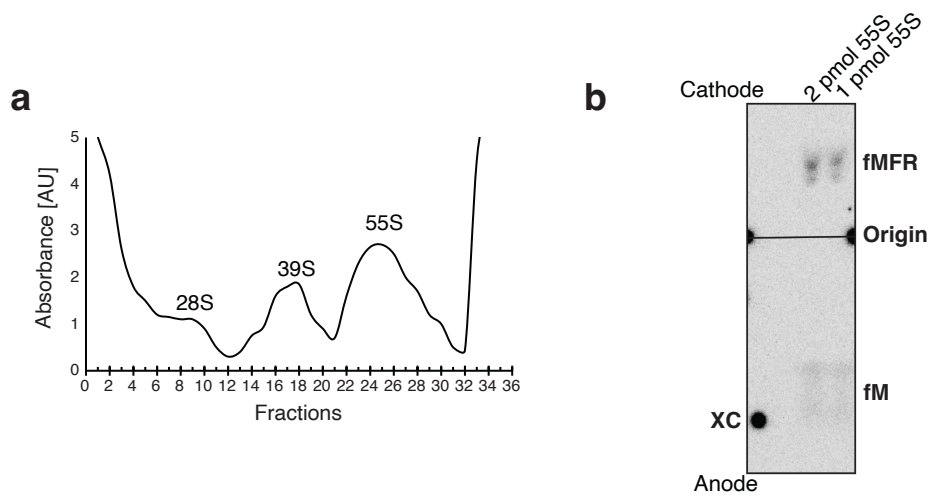

**Supplementary Fig. 6:** *In vitro* mitochondrial translation assay. **a** Purification of liver mitochondrial ribosomes. Fractions 24-28 containing the full monosomes were pooled and used for *in vitro* translation experiments. **b** Analysis of the fM\*FR tripeptide by thin layer electrophoresis. The radioactively labelled tripeptide was located by autoradiography and quantified by scintillation counting.

**Supplementary Table 1: Oligonucleotides used in the study**

| Oligonucleotide name        | Sequence (5'->3')                                                        | Note                                                                                                    |
|-----------------------------|--------------------------------------------------------------------------|---------------------------------------------------------------------------------------------------------|
| SgRNA1 top                  | CACCGTGTTAAGTAAGAATTGGTCC                                                | Generation <i>mtRF1</i> KO cells                                                                        |
| SgRNA1 bottom               | AAACGGACCAATTCTTACTTAACAC                                                | Generation <i>mtRF1</i> KO cells                                                                        |
| SgRNA2 top                  | CACCGGAACAGAAGGCATGCTGAGT                                                | Generation <i>mtRF1</i> KO cells                                                                        |
| SgRNA2 bottom               | AAACTCAGCATGCCTTCTGTTCC                                                  | Generation <i>mtRF1</i> KO cells                                                                        |
| KO PCR primer FWD           | ACCTCCAGTGTACATCCAG                                                      | Analysis <i>mtRF1</i> KO cells                                                                          |
| KO PCR primer REV           | CTGTACTIONACACACGCATATAAGTG                                              | Analysis <i>mtRF1</i> KO cells                                                                          |
| BamHI- <i>mtRF1</i> -FLAG-F | CTTCTTGGATCCATGAATCGTCACCTGTG<br>TGTTGG                                  | Used to clone <i>mtRF1</i> ORF with C-terminal FLAG tag into pcDNA5/FRT/TO                              |
| <i>mtRF1</i> -FLAG-XhoI-R   | AAGAAAGCTCGAGCTACTTATCGTCGTCA<br>TCCTTGTAATCTTTGCTGATTTAAGGTGT<br>TCATCC | Used to clone <i>mtRF1</i> ORF with C-terminal FLAG tag into pcDNA5/FRT/TO                              |
| <i>mtRF1</i> -noFLAG-F      | TAGCTCGAGTCTAGAGGG                                                       | Used to remove C-terminal FLAG tag from the cloned construct                                            |
| <i>mtRF1</i> -noFLAG-R      | TTTTGCTGATTTAAGGTGTTTCATCC                                               | Used to remove C-terminal FLAG tag from the cloned construct                                            |
| <i>mtRF1</i> -AAQ-mut-F     | <b>GCCGCCAG</b> CATGTTAATAAACTGATAG<br>TGCCG                             | Used to create AAQ mutant <i>mtRF1</i> variant; bold part represents codons for AAQ motif               |
| <i>mtRF1</i> -AAQ-mut-R     | TGCTCCTTTGGCTCG                                                          | Used to create AAQ mutant <i>mtRF1</i> variant                                                          |
| CMV forward primer          | CGCAAATGGGCGGTAGGCGTG                                                    | Used to sequence inserts in pcDNA5/FRT/TO-based constructs                                              |
| BGH reverse primer          | TAGAAGGCACAGTCGAGG                                                       | Used to sequence inserts in pcDNA5/FRT/TO-based constructs                                              |
| 3' adapter (RA3)            | TGGAATTCTCGGGTGCCAAGG                                                    | Illumina, cat#RS-200-0012                                                                               |
| 5' adapter (RA5)            | GUUCAGAGUUCUACAGUCCGACGAUC                                               | Illumina, cat#RS-200-0012                                                                               |
| RT primer (RTP)             | GCCTTGGCACCCGAGAATTCCA                                                   | Illumina, cat#RS-200-0012                                                                               |
| RNA PCR primer 1 (RP1)      | AATGATACGGCGACCACCGAGATCTACAC<br>GTTCAGAGTTCTACAGTCCGA                   | Illumina, cat#RS-200-0012                                                                               |
| RNA PCR primer 2 (RP2)      | CAAGCAGAAGACGGCATAACGAGATCGTG<br>ATGTGACTGGAGTTCTTGGCACCCGAGA<br>ATTCCA  | Illumina, cat#RS-200-0012                                                                               |
| NB_ND3_F                    | ATAAACTTCGCCTTAATTTAATAATC                                               | Used to produce gene-specific DNA template for northern blotting probe, same for oligonucleotides below |

|                                                               |                                                                                                                                                                                                                                                                                                        |                                  |
|---------------------------------------------------------------|--------------------------------------------------------------------------------------------------------------------------------------------------------------------------------------------------------------------------------------------------------------------------------------------------------|----------------------------------|
| NB_ND3_R                                                      | <b>TAATACGACTCACTATAGGGATT</b> CGGTT<br>AGTCTAATCCTTTTTGTAG                                                                                                                                                                                                                                            | Bold part represents T7 promoter |
| NB_CYTB_F                                                     | CTACCTTCACGCCAATGG                                                                                                                                                                                                                                                                                     |                                  |
| NB_CYTB_R                                                     | TTTGTTAGGGACGGATCG                                                                                                                                                                                                                                                                                     |                                  |
| NB_ND1_F                                                      | AACCTCAACCTAGGCCTCC                                                                                                                                                                                                                                                                                    |                                  |
| NB_ND1_R                                                      | AATGCTAGGGTGAGTGGTAGG                                                                                                                                                                                                                                                                                  |                                  |
| NB_COX1_F                                                     | CTTATTCGAGCCGAGCTG                                                                                                                                                                                                                                                                                     |                                  |
| NB_COX1_R                                                     | GGTATAGAATGGGGTCTCCTC                                                                                                                                                                                                                                                                                  |                                  |
| NB_COX3_F                                                     | CCACCAATCACATGCCTATC                                                                                                                                                                                                                                                                                   |                                  |
| NB_COX3_R                                                     | ACGTGAAGTCCGTGGAAGCC                                                                                                                                                                                                                                                                                   |                                  |
| NB_ND4_F                                                      | ACTACCACTGACATGACTTTCC                                                                                                                                                                                                                                                                                 |                                  |
| NB_ND4_R                                                      | GGAGTCATAAGTGGAGTCCG                                                                                                                                                                                                                                                                                   |                                  |
| NB_COX2_F                                                     | GCGCAAGTAGGTCTACAAGACGC                                                                                                                                                                                                                                                                                |                                  |
| NB_COX2_R                                                     | GCATGAAACTGTGGTTTGCTCC                                                                                                                                                                                                                                                                                 |                                  |
| NB_ND2_F                                                      | TCCCAGAGGTTACCCAAG                                                                                                                                                                                                                                                                                     |                                  |
| NB_ND2_R                                                      | GAGTAGTGTGATTGAGGTGGAG                                                                                                                                                                                                                                                                                 |                                  |
| NB_ATP8/6_F                                                   | CCCATACTCCTTACACTATTCC                                                                                                                                                                                                                                                                                 |                                  |
| NB_ATP8/6_R                                                   | GTTAGCGGTTAGGCGTAC                                                                                                                                                                                                                                                                                     |                                  |
| NB_ND5_F                                                      | GTAGCATTGTTGTTACATGG                                                                                                                                                                                                                                                                                   |                                  |
| NB_ND5_R                                                      | ACTGCTGCGAACAGAGTG                                                                                                                                                                                                                                                                                     |                                  |
| NB_ND6_F                                                      | GGGGTTTTCTTCTAAGCCTTC                                                                                                                                                                                                                                                                                  |                                  |
| NB_ND6_R                                                      | <b>TAATACGACTCACTATAGGG</b> CCCCCGAG<br>CAATCTCAATTAC                                                                                                                                                                                                                                                  | Bold part represents T7 promoter |
| NB_12S_F                                                      | CACTGAAAATGTTTAGACGGG                                                                                                                                                                                                                                                                                  |                                  |
| NB_12S_R                                                      | GGCTCCTCTAGAGGGATATG                                                                                                                                                                                                                                                                                   |                                  |
| NB_16S_F                                                      | TAGATATAGTACCGCAAGGG                                                                                                                                                                                                                                                                                   |                                  |
| NB_16S_R                                                      | GACTTGTTGGTTGATTGTAG                                                                                                                                                                                                                                                                                   |                                  |
| mRNA sequence<br>mitochondrial translation<br>elongation      | AUG UUC AGA CAA UUC AGA CAA GCG<br>GUA GGU CUA CAA CAA GUA CAU UCA<br>AAA UCC AAC                                                                                                                                                                                                                      | In vitro translation assay       |
| mRNA sequence<br>mitochondrial translation<br>termination UAG | AUG CAA UAG UGG UUC AGA CAA GCG<br>GUA GGU CUA CAA CAA GUA CAU UCA<br>AAA UCC AAC                                                                                                                                                                                                                      | In vitro translation assay       |
| mRNA sequence<br>mitochondrial translation<br>termination AGA | AUG CAA AGA UGG UUC AGA CAA GCG<br>GUA GGU CUA CAA CAA GUA CAU UCA<br>AAA UCC AAC                                                                                                                                                                                                                      | In vitro translation assay       |
| mRNA sequence<br>mitochondrial translation<br>termination AGG | AUG CAA AGG UGG UUC AGA CAA GCG<br>GUA GGU CUA CAA CAA GUA CAU UCA<br>AAA UCC AAC                                                                                                                                                                                                                      | In vitro translation assay       |
| mRNA sequence<br>cytoplasmic translation<br>elongation        | GGATCCTAATACGACTCACTATAGGGAGA<br>CCGGAATTCAAAGCAAAAATGTGATCTTG<br>CTTGTAATACAATTTTGAGAGGTTAATA<br>AATTACAAGTAGTGCTATTTTTGTATTTAG<br>GTTAGCTATTTAGCTTTACGTTCCAGGATG<br>CCTAGTGGCAGCCCCACAATATCCAGGAA<br>GCCCTCTCTGCGGTTTTTCAGATTAGGTA<br>GTCGAAAAACCTAAGAAATTTACCT TTC<br>AAAGTGAGACAATGGCTAATGACATTTCA | In vitro translation assay       |

|  |                                                     |  |
|--|-----------------------------------------------------|--|
|  | AGATACCATGGAAGACGCCAAAAACATA<br>AAGAAAGGCCCGGAAGCTT |  |
|--|-----------------------------------------------------|--|

**Supplementary Table 2: Antibodies used in the study**

| Antibodies                                                  | Dilution | Source            | Identifier                        |
|-------------------------------------------------------------|----------|-------------------|-----------------------------------|
| MRPL3                                                       | 1:1000   | Sigma-Aldrich     | RRID: AB_2678606; Cat#HPA043665   |
| MRPS15                                                      | 1:2000   | Proteintech Group | RRID: AB_2301068; Cat#17006-1-AP  |
| OXPPOS cocktail human                                       | 1:1000   | Abcam             | Cat#ab110411                      |
| mtRF1                                                       | 1:1000   | Sigma-Aldrich     | RRID: AB_10795038; Cat# HPA043316 |
| SDHA                                                        | 1:2000   | Invitrogen        | RRID: AB_1501830; Cat#459200      |
| COX1                                                        | 1:1000   | Invitrogen        | RRID: AB_2532240 ; Cat#459600     |
| ND6                                                         | 1:500    | Thermo Fisher     | RRID: AB_2855404; Cat#PA5-109993  |
| Vinculin                                                    | 1:1000   | Cell Signaling    | RRID: AB_10559207; Ca#4650        |
| Beta-Actin                                                  | 1:1000   | Abcam             | RRID: AB_306371; Cat#ab8226       |
| NDUFB10                                                     | 1:500    | Abcam             | Cat#ab196019                      |
| NDUFA9                                                      | 1:1000   | Abcam             | RRID: AB_301431; Cat#ab14713      |
| COX2                                                        | 1:1000   | Abcam             | RRID: AB_10887758; Cat#ab110258   |
| COX5a                                                       | 1:1000   | Molecular Probes  | RRID: AB_1501848; Cat# A21363     |
| Anti-rabbit IgG F(ab') <sub>2</sub> -HRP                    | 1:5000   | GE Healthcare     | RRID: AB_772191; Cat#NA9340       |
| Sheep Anti-Mouse IgG, Whole Ab ECL Antibody, HRP conjugated | 1:5000   | GE Healthcare     | RRID: AB_772209; Cat#NXA931       |

**Supplementary Table 3: MS data MRPs**

| Gene name | logFC KO2 vs. WT | logFC KO1 vs. WT |
|-----------|------------------|------------------|
| MRPL2     | 0.2              | 1.132            |
| MRPL44    | 0.061            | 0.704            |
| MRPS2     | -0.262           | -0.186           |
| MRPL37    | -0.18            | -0.149           |
| MRPL32    | 0.749            | 0.204            |
| MRPS24    | -0.015           | 0.139            |
| MRPL4     | -0.044           | 0.061            |
| MRPS5     | 0.008            | 0.015            |
| MRPL15    | 0.12             | 0.461            |
| MRPL38    | -0.176           | 0.044            |
| DAP3      | 0.12             | 0.026            |
| MRPL22    | 0.13             | 0.537            |
| MRPS21    | 0.056            | 0.166            |
| MRPS6     | 0.031            | 0.119            |
| MRPS23    | -0.073           | 0.003            |
| MRPL51    | 0.011            | 0.52             |
| MRPL46    | 0.118            | 0.291            |
| MRPL1     | -0.215           | 0.001            |
| MRPL48    | -0.103           | -0.04            |
| MRPS33    | -0.042           | 0.103            |

|          |        |        |
|----------|--------|--------|
| MRPL13   | -0.236 | -0.018 |
| MRPS14   | -0.009 | 0.153  |
| MRPS30   | -0.136 | -0.008 |
| MRPL16   | -0.158 | 0.248  |
| MRPS18C  | -0.1   | -0.038 |
| MRPS26   | -0.092 | 0.189  |
| MRPL20   | -0.059 | 0.034  |
| MRPS34   | -0.124 | -0.089 |
| MRPL35   | -0.063 | 0.379  |
| MRPL28   | -0.165 | 0.04   |
| MRPS17   | -0.036 | 0.018  |
| MRPL57   | -0.067 | 0.158  |
| MRPS16   | 0.489  | 0.591  |
| MRPL34   | 0.17   | 0.483  |
| AURKAIP1 | -0.11  | 0.11   |
| MRPL3    | 0.087  | 0.197  |
| MRPL40   | 0.105  | 0.502  |
| MRPS31   | -0.073 | -0.046 |
| MRPL10   | -0.128 | -0.02  |
| MRPL50   | -0.082 | 0.048  |
| MRPS12   | 0.287  | 0.569  |
| MRPL42   | -0.069 | -0.013 |
| MRPS27   | 0.058  | 0.04   |
| MRPL33   | -0.09  | 0.035  |
| MRPS15   | 0.398  | 0.558  |
| MRPL24   | -0.099 | 0.165  |
| MRPL21   | -0.304 | -0.12  |
| MRPL23   | -0.264 | 0.046  |
| MRPL18   | -0.22  | 0.055  |
| MRPS18A  | -0.085 | 0.156  |
| MRPS25   | -0.006 | 0.074  |
| MRPL39   | -0.066 | 0.242  |
| CHCHD1   | 0.246  | -0.188 |
| MRPL30   | 0.023  | 0.14   |
| MRPL11   | -0.037 | 0.107  |
| MRPL27   | -0.131 | 0.094  |
| MRPL54   | -0.24  | 0.057  |
| MRPL41   | -0.17  | 0.239  |
| MRPL55   | -0.068 | 0.156  |
| MRPS18B  | 0.111  | 0.306  |
| MRPL43   | -0.224 | 0.239  |
| MRPS10   | 0.151  | 0.241  |

|        |        |        |
|--------|--------|--------|
| MRPS11 | 0.122  | 0.267  |
| MRPL9  | 0.157  | 0.545  |
| MRPS35 | 0.024  | 0.134  |
| MRPL49 | 0.083  | 0.302  |
| MRPS22 | 0.292  | 0.477  |
| MRPS28 | 0.051  | 0.216  |
| MRPL14 | 0.005  | 0.41   |
| MRPL53 | -0.049 | -0.034 |
| MRPL45 | -0.018 | 0.187  |
| MRPL17 | 0.088  | 0.249  |
| MRPL19 | -0.014 | 0.186  |

**Supplementary Table 4: MS data OXPHOS complexes**

| Gene name | Complex | logFC KO2 vs. WT | logFC KO1 vs. WT |
|-----------|---------|------------------|------------------|
| NDUFA7    | I       | -0.025           | -0.002           |
| NDUFA12   | I       | 0.055            | -0.016           |
| NDUFC2    | I       | -0.165           | -0.22            |
| NDUFS5    | I       | 0.122            | 0.029            |
| NDUFB7    | I       | 0.081            | 0.023            |
| NDUFB5    | I       | -0.481           | -0.219           |
| NDUFA13   | I       | -0.058           | -0.265           |
| NDUFB1    | I       | 0.094            | -0.006           |
| NDUFA2    | I       | -0.228           | -0.178           |
| NDUFS4    | I       | 0.003            | 0.21             |
| NDUFS3    | I       | -0.073           | -0.141           |
| NDUFA10   | I       | -0.134           | -0.117           |
| NDUFB4    | I       | -0.132           | -0.13            |
| NDUFB9    | I       | -0.038           | 0.296            |
| NDUFS6    | I       | 0.051            | -0.189           |
| NDUFB2    | I       | -0.407           | 0.239            |
| NDUFA9    | I       | -0.224           | -0.369           |
| NDUFA5    | I       | -0.06            | -0.007           |
| NDUFB10   | I       | 0.24             | 0.169            |
| NDUFA8    | I       | 0.125            | 0.003            |
| NDUFB3    | I       | 0.101            | -0.163           |
| NDUFC1    | I       | 0.349            | 0.182            |
| NDUFB11   | I       | -0.088           | -0.276           |
| NDUFB6    | I       | 0.403            | 0.169            |
| NDUFV3    | I       | 0.5              | 0.783            |
| SDHB      | II      | 0.1              | 0.148            |
| SDHA      | II      | 0.296            | -0.76            |
| UQCRCF1   | III     | -0.159           | 0.08             |

|         |     |        |        |
|---------|-----|--------|--------|
| UQCRQ   | III | -0.274 | -0.128 |
| UQCRH   | III | 0.549  | 0.635  |
| UQCRB   | III | -0.126 | 0.156  |
| COX5B   | IV  | -0.993 | -0.919 |
| COX6C   | IV  | -1.039 | -0.976 |
| COX6B1  | IV  | -0.579 | -0.72  |
| NDUFA4  | IV  | -1.463 | -0.703 |
| COX7A2  | IV  | -1.202 | -0.917 |
| COX7C   | IV  | -0.721 | -0.636 |
| COX5A   | IV  | -0.507 | -0.695 |
| COX411  | IV  | -0.134 | -0.167 |
| MT-ATP8 | V   | 0.025  | 0.219  |
| MP68    | V   | -0.063 | -0.243 |
| ATPIF1  | V   | 0.241  | 1.194  |
| ATP5J   | V   | 0.045  | 0.161  |
| ATP5J2  | V   | -0.053 | -0.195 |
| ATP5O   | V   | -0.007 | 0.262  |
| ATP5E   | V   | 0.901  | 0.987  |
| ATP5D   | V   | 0.072  | 0.023  |
| ATP5F1  | V   | -0.018 | -0.141 |
| ATP5A1  | V   | 0.114  | 0.126  |
| ATP5B   | V   | 0.046  | -0.168 |
| ATP5H   | V   | 0.018  | 0.164  |
| ATP5C1  | V   | 0.069  | -0.076 |

**Supplementary Table 5: MS data OXPHOS assembly factors**

| Gene name | Complex | logFC KO2 vs. WT | logFC KO1 vs. WT |
|-----------|---------|------------------|------------------|
| ATP5SL    | I       | 0.327            | 0.248            |
| TIMMDC1   | I       | 0.173            | 0.478            |
| C17orf89  | I       | 0.252            | 0.711            |
| NDUFAF7   | I       | -0.227           | 0.234            |
| NDUFAF5   | I       | -0.375           | -0.479           |
| NDUFAF3   | I       | -0.014           | -0.382           |
| NDUFAF4   | I       | -0.123           | 0.055            |
| NDUFAF2   | I       | 0.481            | 0.462            |
| TMEM126B  | I       | 0.382            | -0.057           |
| ECSIT     | I       | 0.026            | 0.187            |
| NDUFAF1   | I       | -0.227           | -0.077           |
| ACAD9     | I       | -0.078           | -0.033           |
| LYRM2     | I       | -0.283           | 0.008            |
| SDHAF2    | II      | 0.309            | 0.164            |
| SDHAF4    | II      | 1.161            | 1.311            |

|         |     |        |        |
|---------|-----|--------|--------|
| SDHAF1  | II  | -0.192 | -0.117 |
| SDHAF3  | II  | -0.434 | 0.337  |
| LYRM7   | III | 0.04   | 0.12   |
| UQCC2   | III | 0.267  | 0.315  |
| TTC19   | III | 0.19   | 0.061  |
| BCS1L   | III | 0.097  | -0.264 |
| COA5    | IV  | -0.315 | -0.784 |
| PET117  | IV  | -0.733 | -0.765 |
| CMC1    | IV  | -0.06  | -0.377 |
| PNKD    | IV  | 0.255  | 0.096  |
| COX18   | IV  | 0.459  | -0.084 |
| COX20   | IV  | -0.016 | -0.25  |
| CMC2    | IV  | 0.642  | 0.124  |
| CEP89   | IV  | 0.412  | 0.609  |
| SURF1   | IV  | -0.083 | -0.055 |
| CMC2    | IV  | 0.182  | -0.03  |
| COA4    | IV  | 0.489  | -0.032 |
| SMIM20  | IV  | 0.074  | 0.045  |
| COA7    | IV  | 0.08   | -0.226 |
| COA6    | IV  | 0.237  | 0.139  |
| ATPAF1  | V   | 0.037  | 0.274  |
| FAM173B | V   | 0.168  | -0.43  |
| C7orf55 | V   | -0.184 | 0.4    |

**Supplementary Table 6:** TMT labeling scheme

| tmt_label | Genotype  | Replicate | Sample      |
|-----------|-----------|-----------|-------------|
| 126       | WT        | 1         | WT_1        |
| 127N      | WT        | 2         | WT_2        |
| 127C      | WT        | 3         | WT_3        |
| 128N      | MtRF1_KO2 | 1         | MtRF1_KO2_1 |
| 128C      | MtRF1_KO2 | 2         | MtRF1_KO2_2 |
| 129N      | MtRF1_KO2 | 3         | MtRF1_KO2_3 |
| 131N      | MtRF1_KO1 | 1         | MtRF1_KO1_1 |
| 131C      | MtRF1_KO1 | 2         | MtRF1_KO1_2 |
| 132N      | MtRF1_KO1 | 3         | MtRF1_KO1_3 |
